# Supplementary material for: Moderate-temperature fabrication of BaZrS3 thin films via dithiocarbamate-based solution processing and oxygen-sink boron sulfurization
Source: Royal Society of Chemistry journal article supplement (doi:10.1039/d4ta08848d), 2025-01-01
Supplement: d4ta08848d1.pdf [file d4ta08848d1.pdf]

## Supplementary Information

### **Moderate-temperature fabrication of BaZrS<sub>3</sub> thin films via dithiocarbamate-based solution processing and oxygen-sink boron sulfurization**

*Jaewook Lee<sup>a</sup>, Neul Ha<sup>a</sup>, Jisu Jung<sup>a</sup>, GwangHee Lee<sup>b</sup>, Sunil V. Barma<sup>a</sup>, Jae-Hwan Kim<sup>b</sup>, Jung Kyu Kim<sup>a,b</sup>, Sae Byeok Jo<sup>a,c,d</sup>, Jin-Wook Lee<sup>b,c,d</sup>, Wooseok Yang<sup>a,c,d\*</sup>*

a. School of Chemical Engineering, Sungkyunkwan University. Suwon 16419, Republic of Korea.

b. Department of Nano Engineering and Department of Nano Science and Technology, SKKU Advanced Institute of Nanotechnology (SAINT), Sungkyunkwan University, Suwon 16419 Republic of Korea.

c. SKKU Institute of Energy Science and Technology (SIEST), Sungkyunkwan University, Suwon 16419, Republic of Korea.

d. Department of Future Energy Engineering (DFEE), Sungkyunkwan University (SKKU), Suwon 16419, Republic of Korea.

E-mail: wooseok.yang@skku.edu

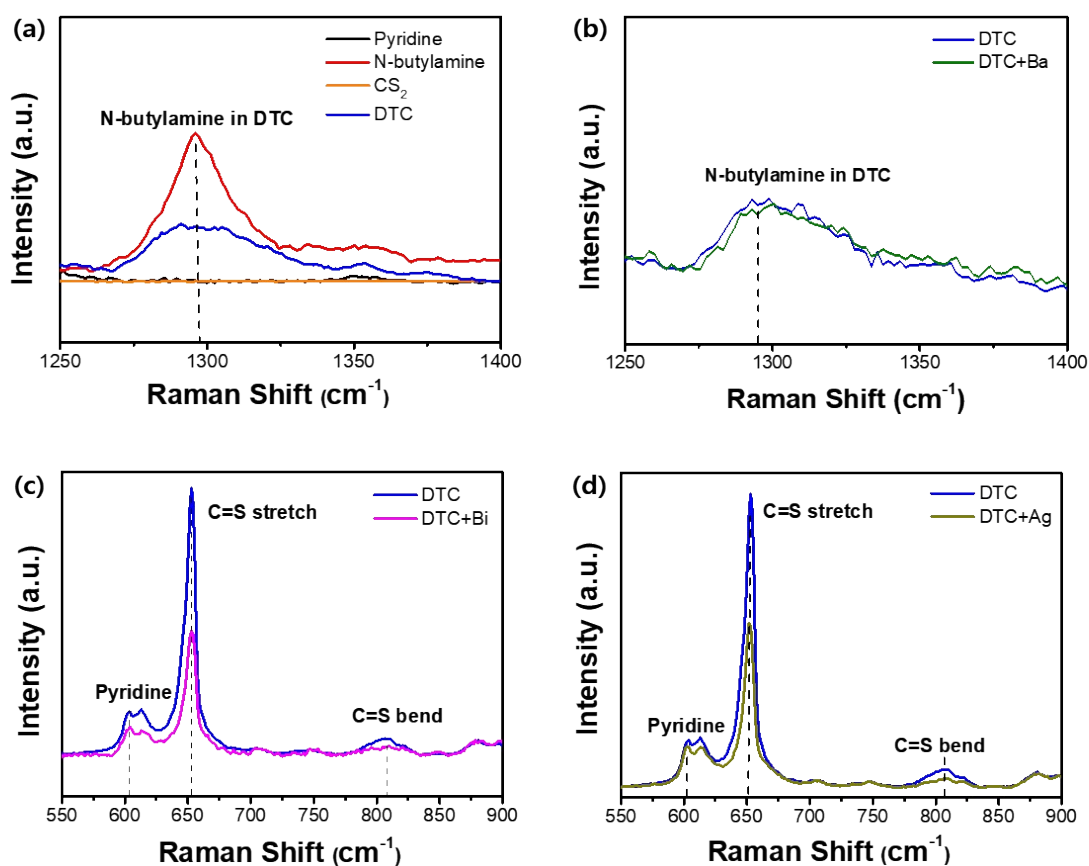

**Fig. S1.** Liquid Raman spectroscopy (Raman spectra) of solutions. (a) Raman spectra of pure *N*-butylamine, Pyridine, CS<sub>2</sub>, and DTC. (b) Raman spectra of DTC+Ba solution compared with DTC in range of 1250-1400 cm<sup>-1</sup>. (c) Raman spectra of DTC+Bi solution compared with DTC in range of 550-900 cm<sup>-1</sup>. (d) Raman spectra of DTC+Ag solution compared with DTC in range of 550-900 cm<sup>-1</sup>.

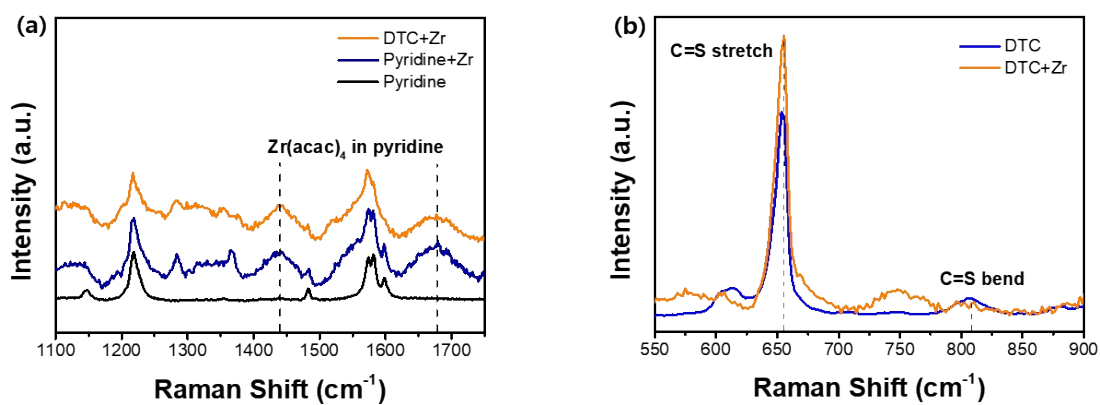

**Fig. S2.** Raman spectra in Zr-DTC solution. (a) Raman spectra of DTC+Zr solution compared with pyridine and pyridine+Zr solution. (b) Raman spectra of DTC+Zr solution compared with DTC solution.

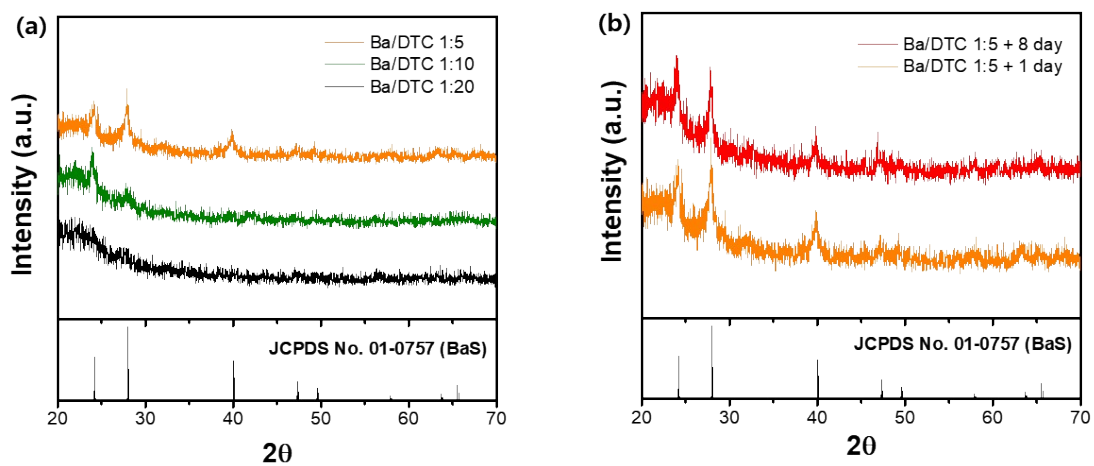

**Fig. S3.** X-ray diffraction (XRD) patterns of BaS films with different Ba/DTC ratios and different aging times. (a) XRD patterns of BaS films with different Ba/DTC ratios (1:5, 1:10, and 1:20). (b) XRD patterns of BaS films from two Ba-DTC solutions with different aging times (1 day and 8 days).

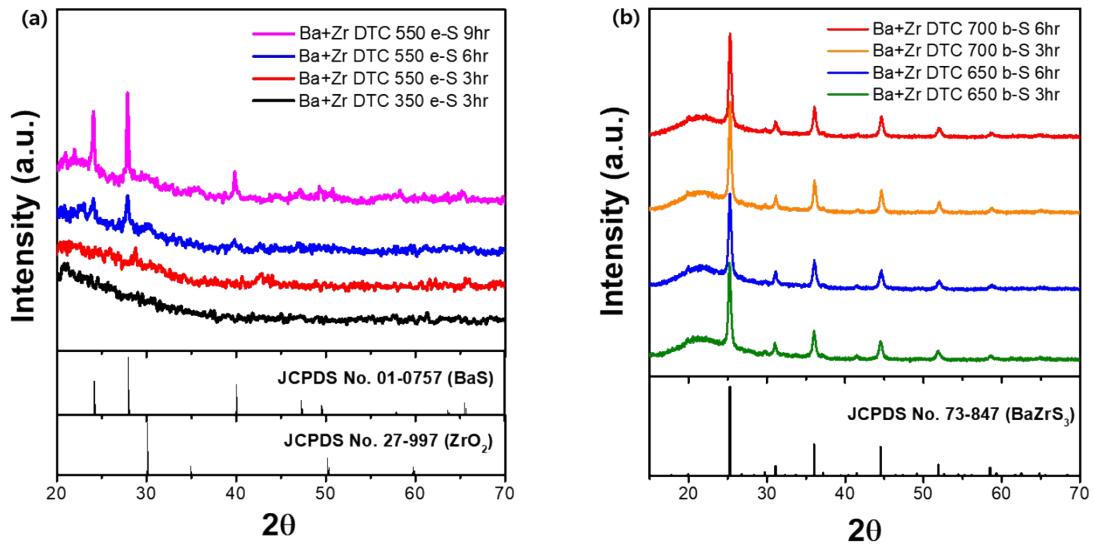

**Fig. S4.** X-ray diffraction (XRD) patterns of Ba+Zr DTC film sulfurized with two methods (e-S and b-S). (a) XRD patterns of Ba+Zr DTC film sulfurized with e-S method at different temperatures (350 and 550 °C) and different sulfuration times (3hr, 6hr, and 9hr). (b) XRD patterns of Ba+Zr DTC film sulfurized with b-S method at different temperatures (650 and 700 °C) and different sulfuration times (3hr and 6hr).

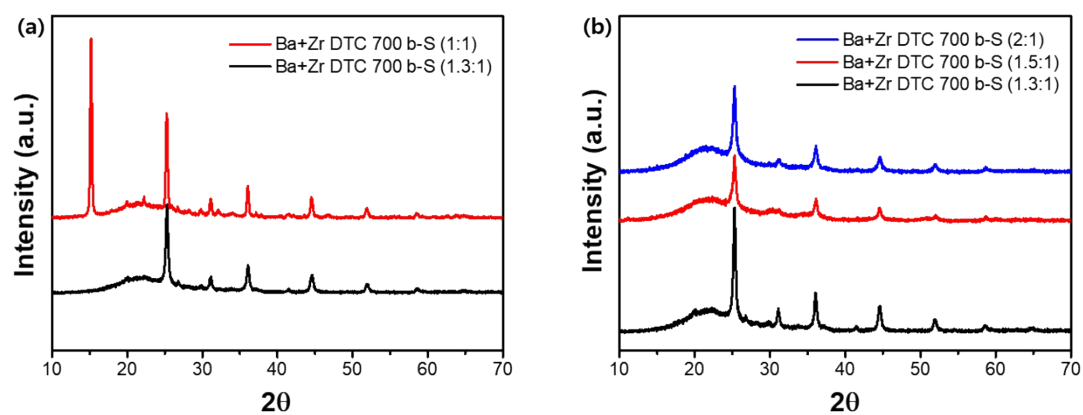

**Fig. S5.** X-ray diffraction (XRD) patterns of Ba+Zr DTC film sulfurized at 700 °C boron sulfurization method from various Ba/Zr ratio solutions. (a) XRD patterns of two samples with different Ba/Zr ratios (Ba:Zr = 1:1 and 1.3:1). (b) XRD patterns of three samples with different Ba/Zr ratios (Ba:Zr = 1.3:1, 1.5:1, and 2:1).

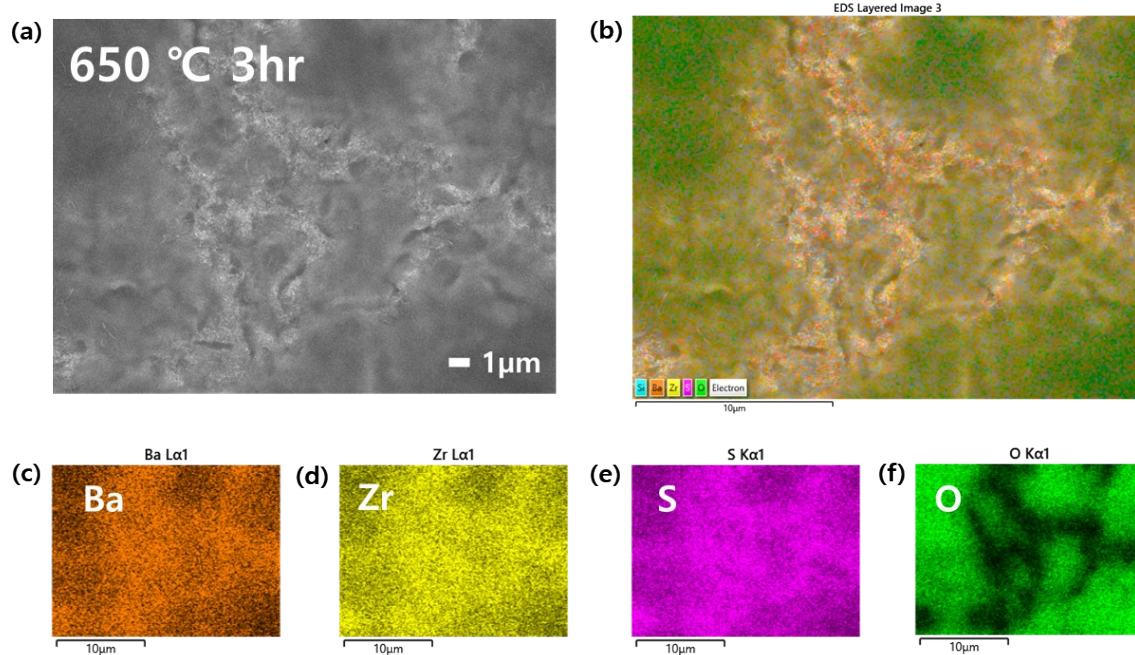

**Fig. S6.** Top-view scanning electron microscopy (SEM) image of BaZrS<sub>3</sub> thin film sulfurized at 650 °C (3hr) with boron sulfurization method. (a) Surface SEM images of BaZrS<sub>3</sub> thin film. (b) Combined energy dispersive X-ray (EDX) mapping images of Ba, Zr, S, and O. (c-f) EDX mapping of BaZrS<sub>3</sub> thin films with Ba, Zr, S, and O components in order.

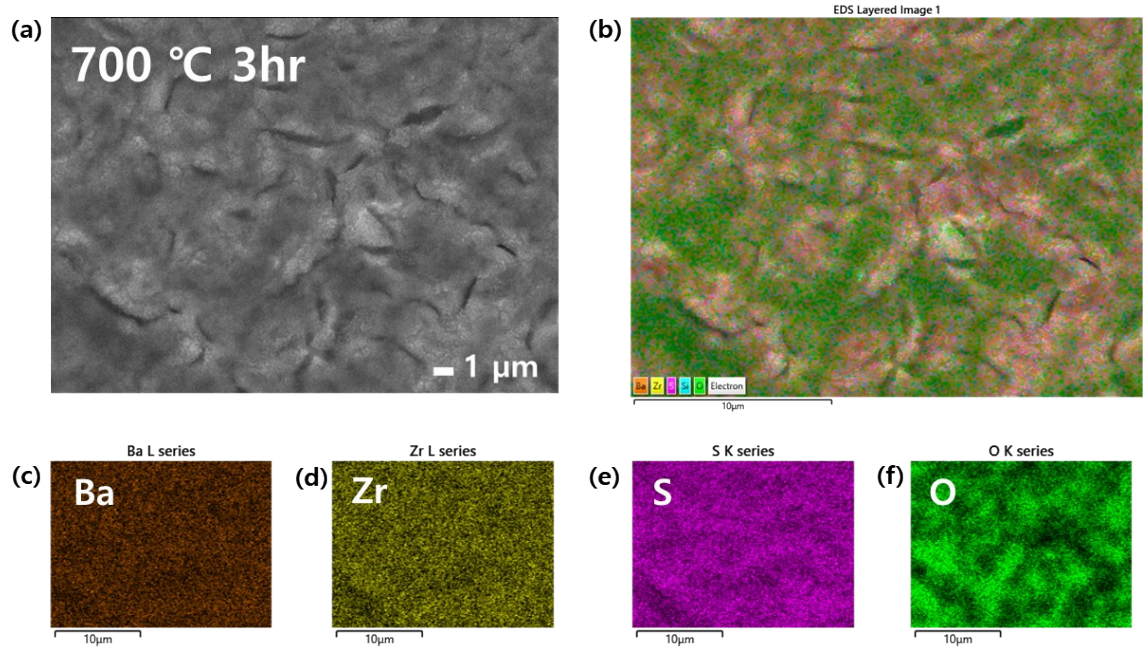

**Fig. S7.** Top-view scanning electron microscopy (SEM) image of BaZrS<sub>3</sub> thin film sulfurized at 700 °C (3hr) with boron sulfurization method. (a) Surface SEM images of BaZrS<sub>3</sub> thin film. (b) Combined energy dispersive X-ray (EDX) mapping images of Ba, Zr, S, and O. (c-f) EDX mapping of BaZrS<sub>3</sub> thin films with Ba, Zr, S, and O components in order.



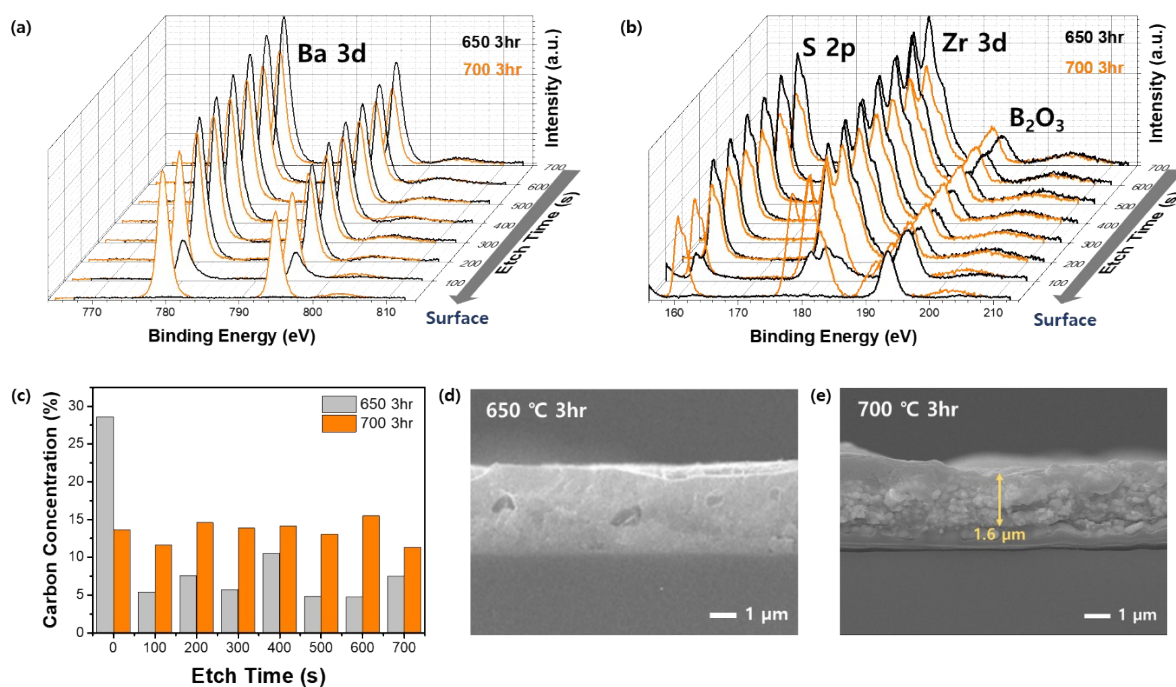

**Fig. S8.** Elemental distributions and concentration at various etch time with cross-sectional scanning electron microscopy (SEM) images of two samples. (a) Distributions of Ba 3d signals in depth-profile X-ray photoelectron spectroscopy (XPS) for two temperature conditions (650 and 700 °C). (b) Distributions of S 2p, Zr 3d, and B<sub>2</sub>O<sub>3</sub> signals in depth-profile XPS for two temperature conditions (650 and 700 °C). (c) Carbon concentrations (%) at various etch times for two temperature conditions (650 and 700 °C). (d-e) Cross-sectional SEM images of BaZrS<sub>3</sub> samples for two temperature conditions (650 and 700 °C).

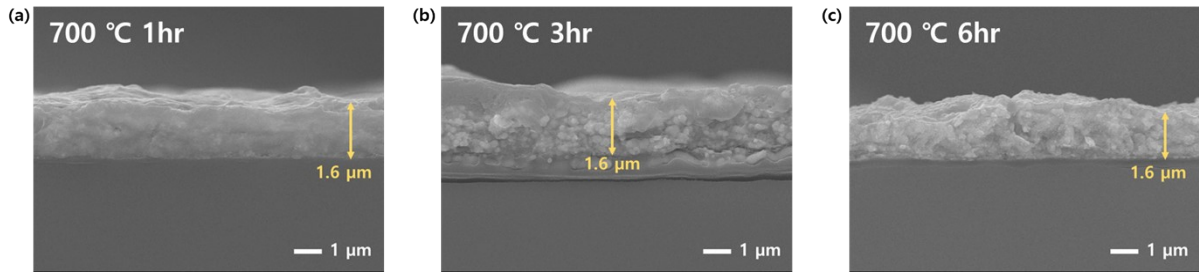

**Fig. S9.** Cross-sectional scanning electron microscopy (SEM) images of BaZrS<sub>3</sub> thin films at 700 °C (a) 1hr, (b) 3hr, and (c) 6hr with boron sulfurization method.
